# Supplementary material for: A sensitive OFF–ON–OFF fluorescent probe for the cascade sensing of Al3+ and F− ions in aqueous media and living cells
Source: Royal Society of Chemistry journal article supplement (doi:10.1039/d0ra02848g), 2020-01-01
Supplement: d0ra02848g1.pdf [file d0ra02848g1.pdf]

Electronic Supplementary Material (ESI) for RSC Advances.

This journal is © The Royal Society of Chemistry 2020

## Supporting information

### **A Sensitive OFF-ON-OFF Fluorescent Probe for the Cascade Sensing of Al<sup>3+</sup> and F<sup>-</sup> Ions in Aqueous Media and Living Cells**

Lingjie Hou<sup>a,c</sup>, Wenting Liang<sup>b\*</sup>, Chenhua Deng<sup>a,c</sup>, Caifeng Zhang<sup>a,c</sup>, Bo Liu<sup>d</sup>, Shaomin Shuang<sup>b</sup>, Yu Wang<sup>b\*</sup>

*a. Department of Chemistry, Taiyuan Normal University, Jinzhong, 030619, PR China.*

*b. Department of Chemistry, Institute of Environmental Science, Shanxi University, Taiyuan, 030006, PR China.*

*c. Humic Acid engineering and Technology Research Center of Shanxi Province, Jinzhong, 030619, PR China.*

*d. National Institutes for Food and Drug Control, Beijing 100050, P. R. of China.*

*Corresponding authors: E-mail addresses: liangwt@sxu.edu.cn (W. T. Liang), wangyu1168@sxu.edu.cn (Y. Wang)*

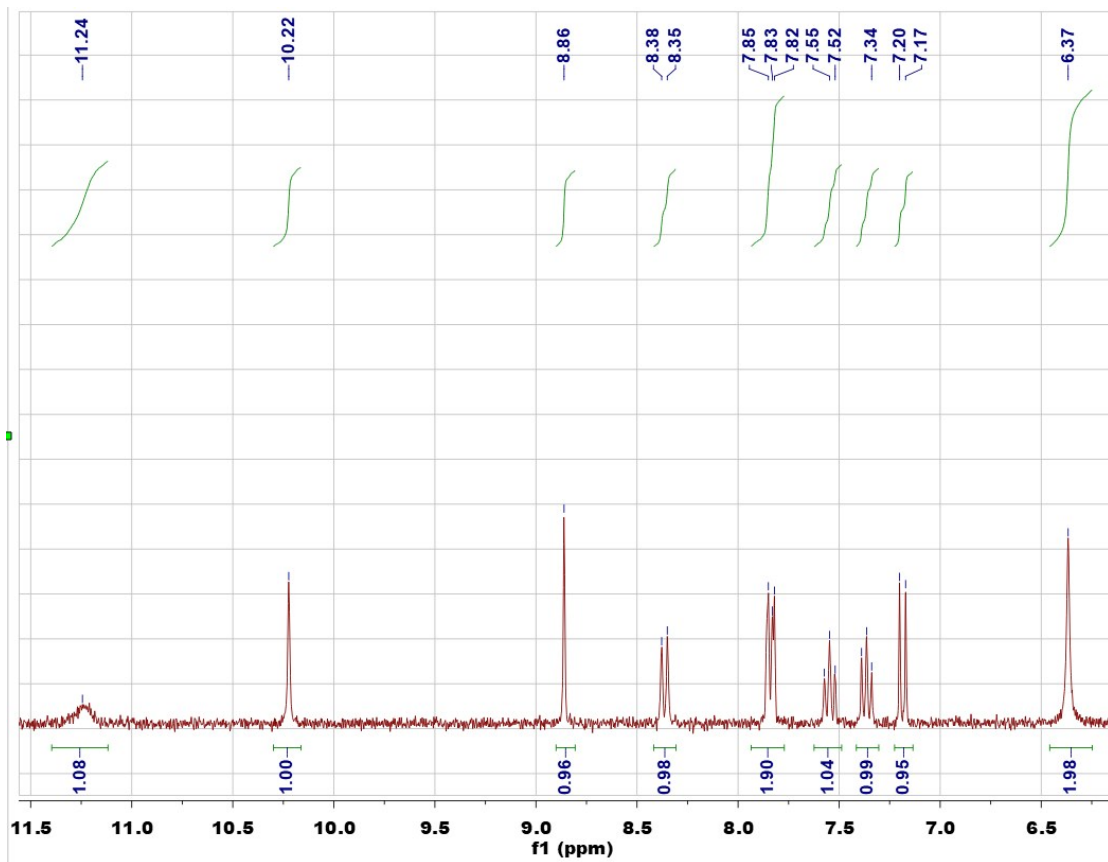

Fig. S1 <sup>1</sup>H NMR spectra of HNS

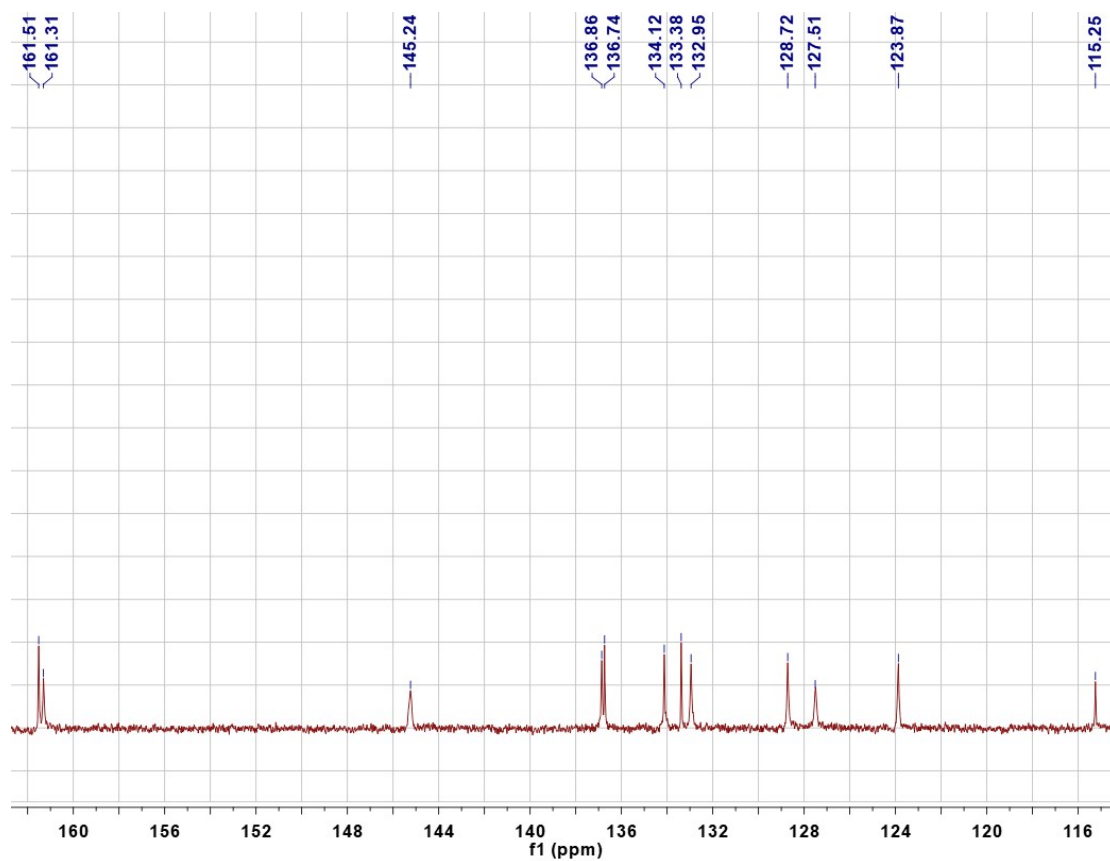

Fig. S2  $^{13}\text{C}$  NMR spectra of HNS

L1 #269 RT: 0.64 AV: 1 NL: 1.93E9  
T: FTMS + c ESI Full ms [100.0000-1000.0000]

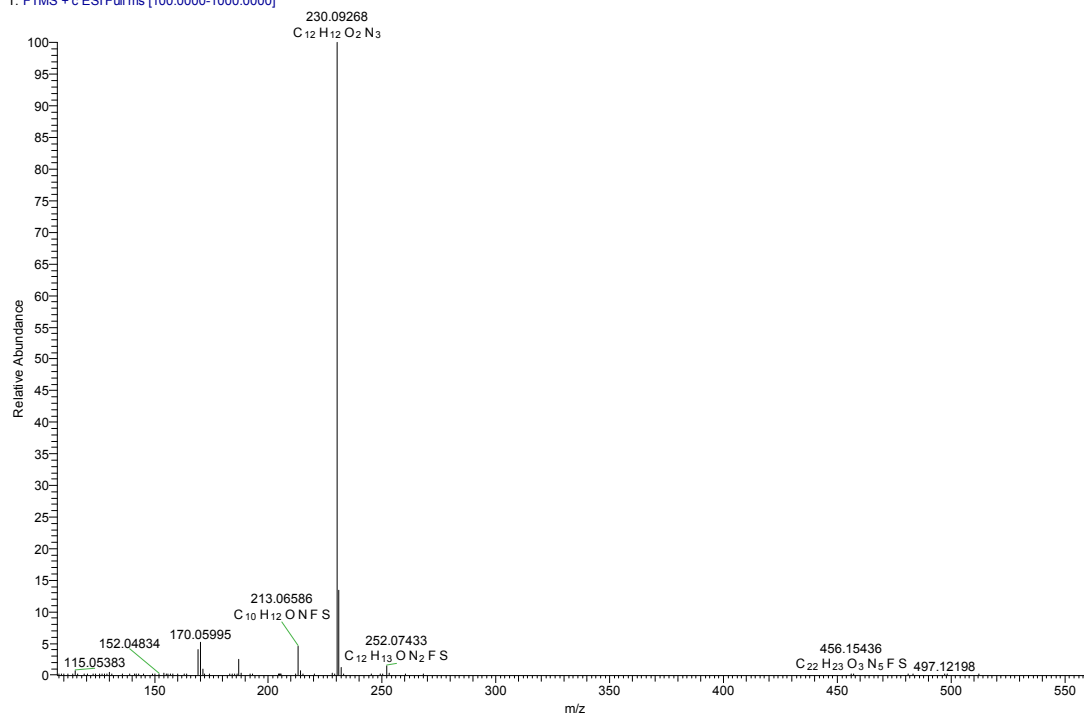

Fig. S3 The ESI-MS spectra of HNS

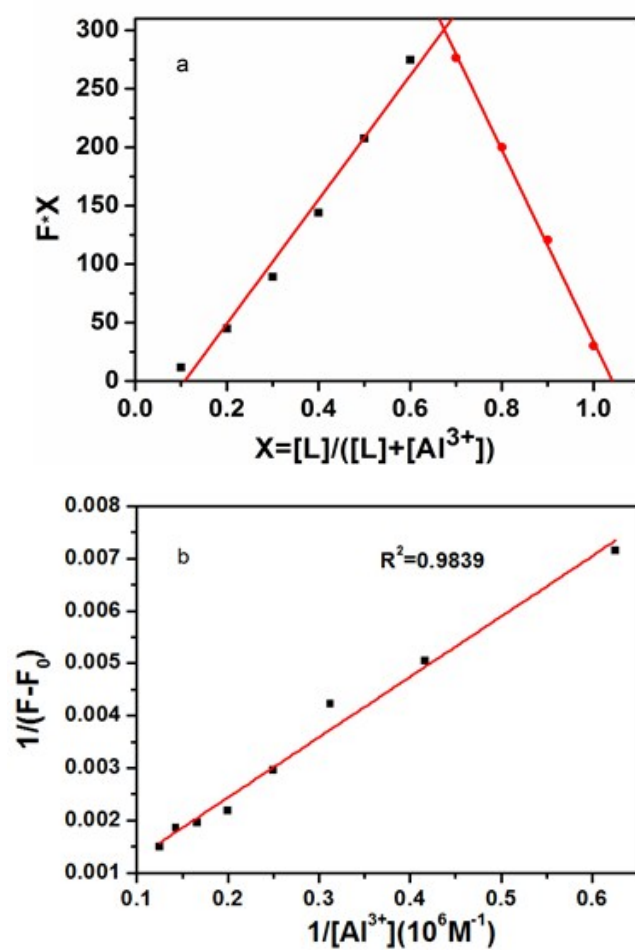

**Fig. S4** (a) Job's plot for **HNS** and  $\text{Al}^{3+}$  complexation in EtOH/ $\text{H}_2\text{O}$  (1:9, v/v, pH 5.3). The total concentration of **HNS** and  $\text{Al}^{3+}$  is 10  $\mu\text{M}$ . (b) Benesi-Hildebrand plot from fluorescence titration data of **HNS** with  $\text{Al}^{3+}$ .

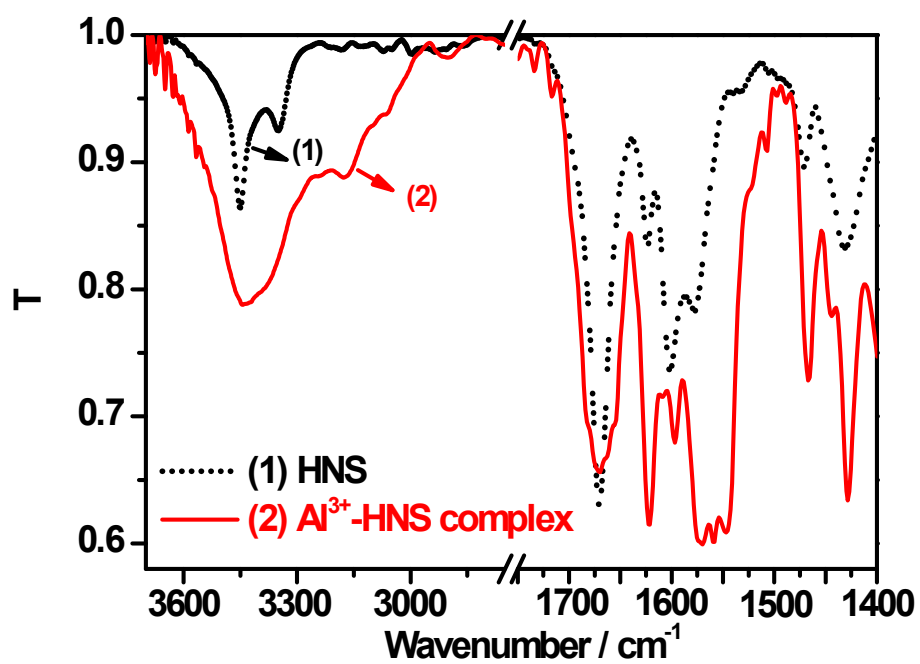

Fig. S5 FTIR spectra of HNS (1) and Al<sup>3+</sup>-HNS complex (2)

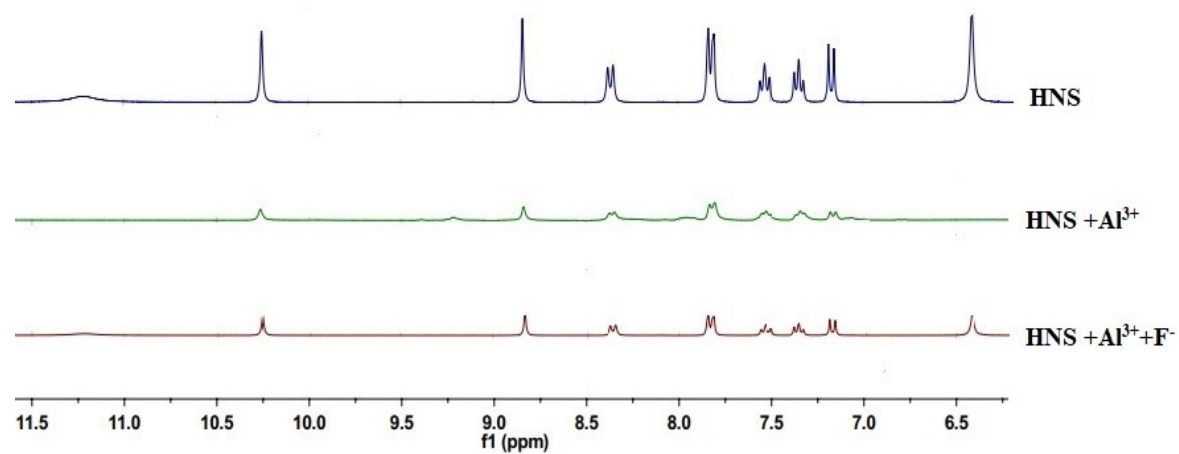

**Fig. S6**  $^1\text{H}$  NMR spectra of **HNS**, **HNS +  $\text{Al}^{3+}$**  and **HNS +  $\text{Al}^{3+}$  +  $\text{F}^-$**

L1+AL+F\_200512102713 #332 RT: 1.16 AV: 1 NL: 2.05E8  
T: FTMS + c ESI Full ms [50.0000-750.0000]

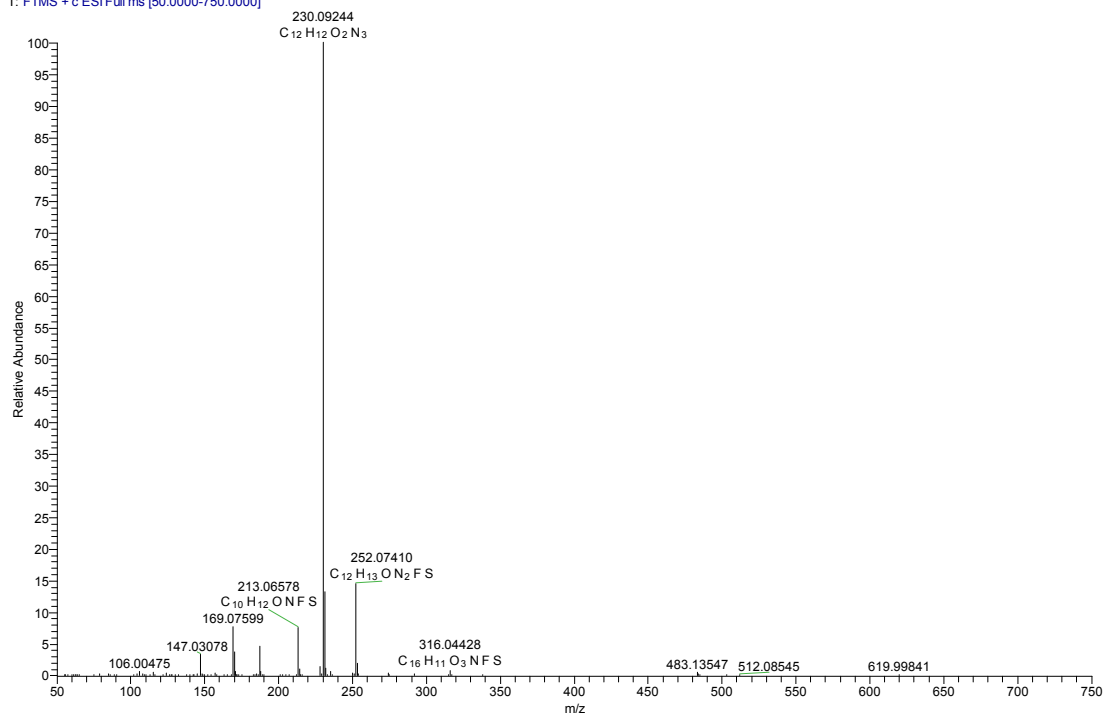

**Fig. S7** The ESI-MS spectra of HNS + Al<sup>3+</sup>+F<sup>-</sup>



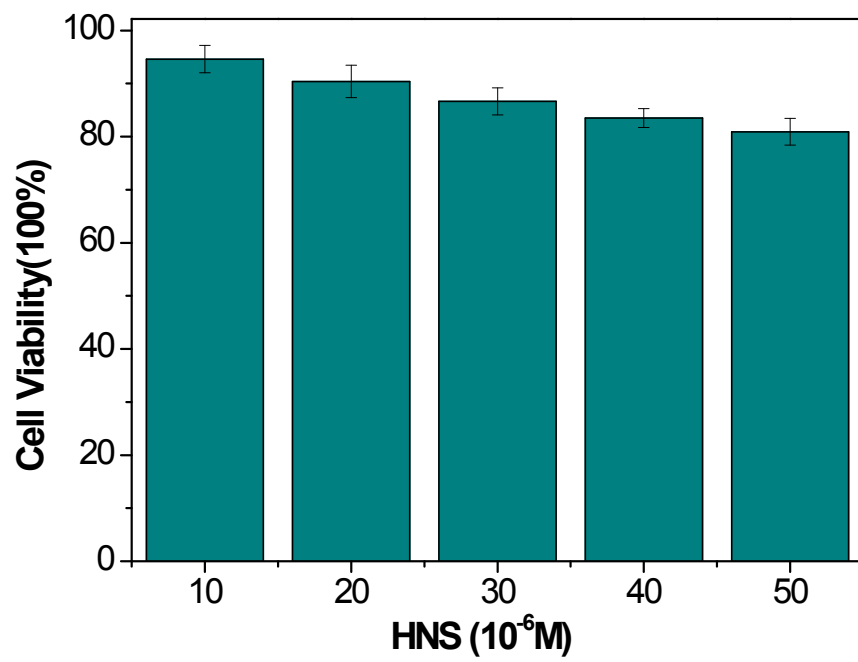

**Fig. S8** Cell viability test of SiHa cells treated with various concentrations of the **HNS** (from 0 to 50  $\mu$ M) for 24 h.
